# Supplementary material for: Synthesis and multifunctional applications of quantum nanobeads for label-free and selective metal chemosensing
Source: Royal Society of Chemistry journal article supplement (doi:10.1039/c5ra07069d), 2015-01-01
Supplement: c5ra07069d1.pdf [file c5ra07069d1.pdf]

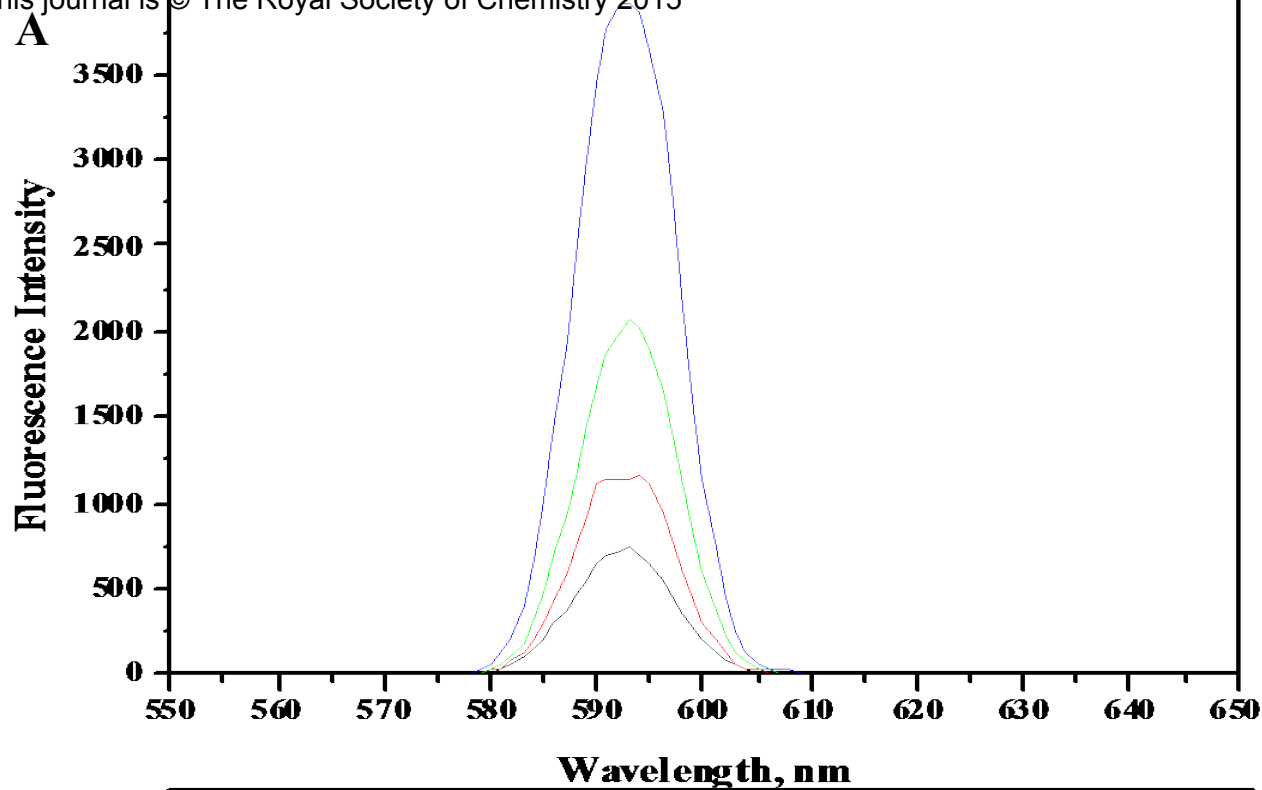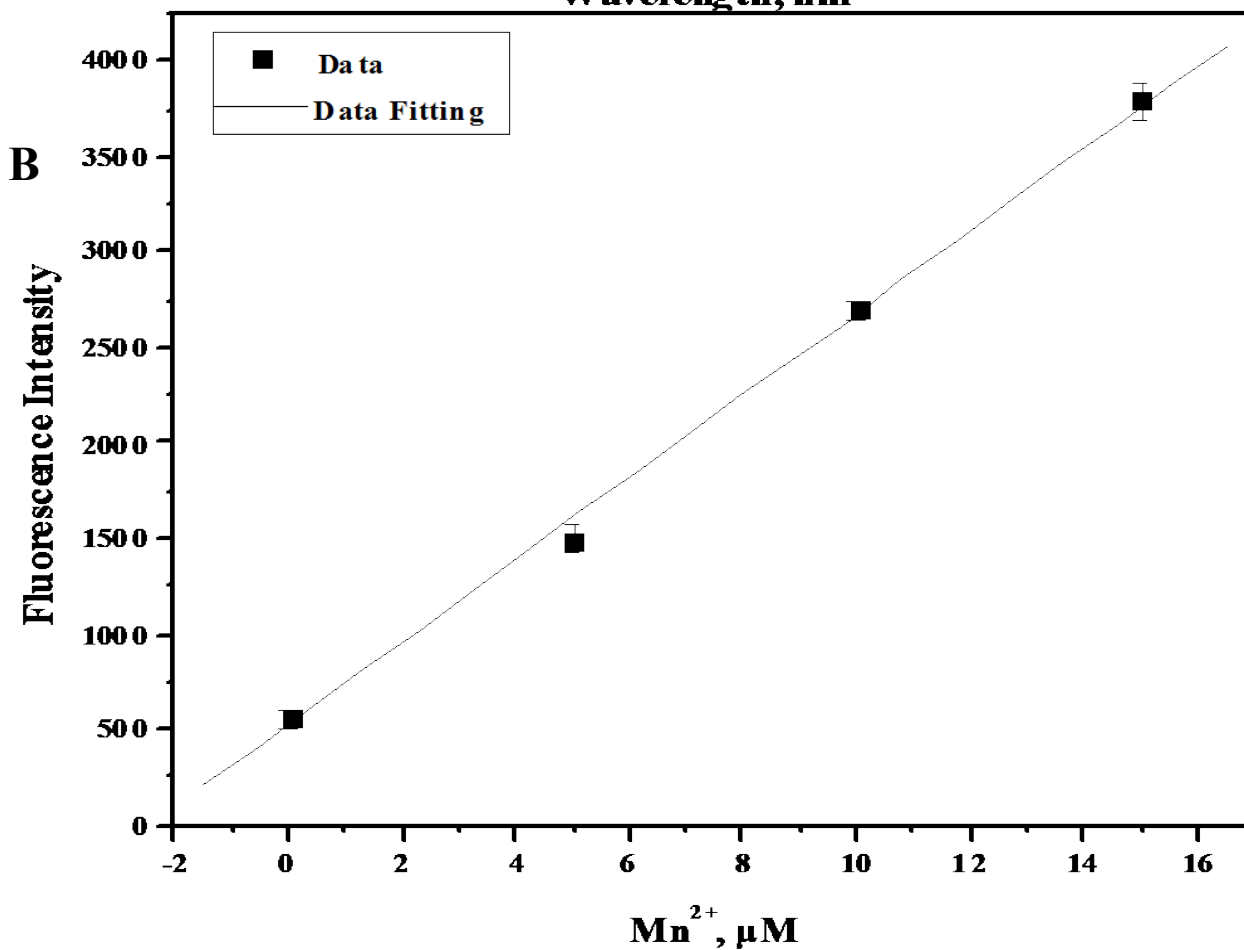

**Figure S1.** (A) Fluorescence responds upon addition different [Mn] and (B) linear relationship of the fluorescence changes and [Mn]
